# Supplementary material
Source: Springer Nature journal article supplement (https://www.springermedizin.de/resource/supplementary/13256_2011_1884_MOESM3_ESM.pdf/9648674)

**HE**

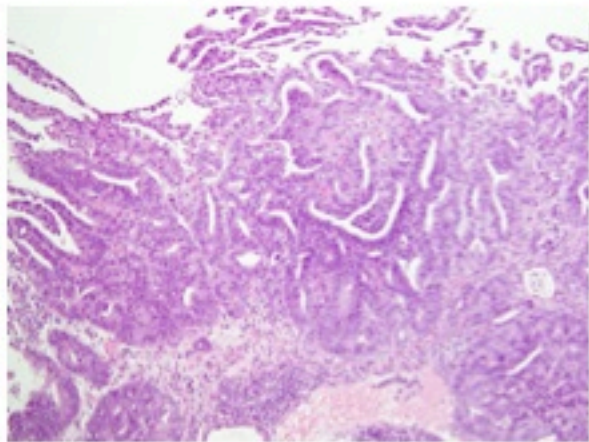

**A**

**CEA**

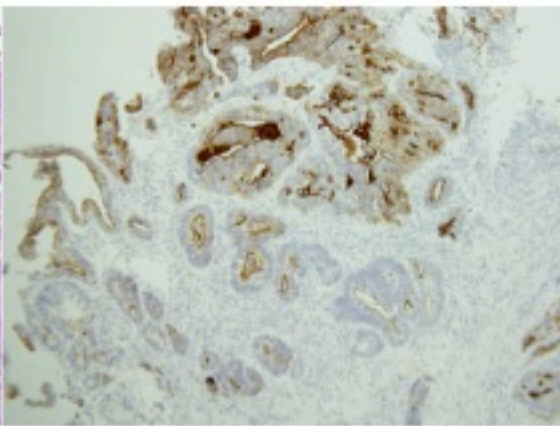

**B**

**AFP**

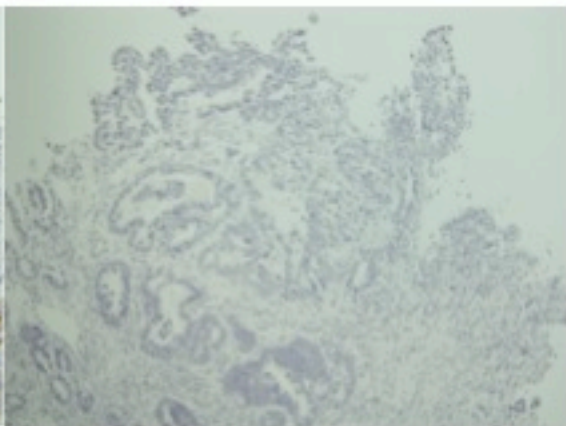

**C**

Supplement: MOESM3 [file 9648674]
